# Supplementary material for: Carboxymethyldextran sodium-modified SnO2 enables highly efficient and stable perovskite solar cells with a high fill factor of 84.89%
Source: Royal Society of Chemistry journal article supplement (doi:10.1039/d4ta05551a), 2024-01-01
Supplement: d4ta05551a1.pdf [file d4ta05551a1.pdf]

### Supporting Information

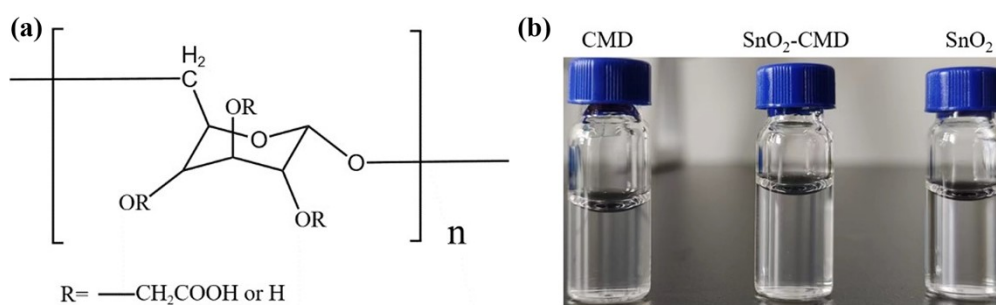

Figure S1. a) Molecular structure of CMD b) Photograph of the CMD, SnO<sub>2</sub>, SnO<sub>2</sub>+ CMD mixture in H<sub>2</sub>O solution before and after oscillation.

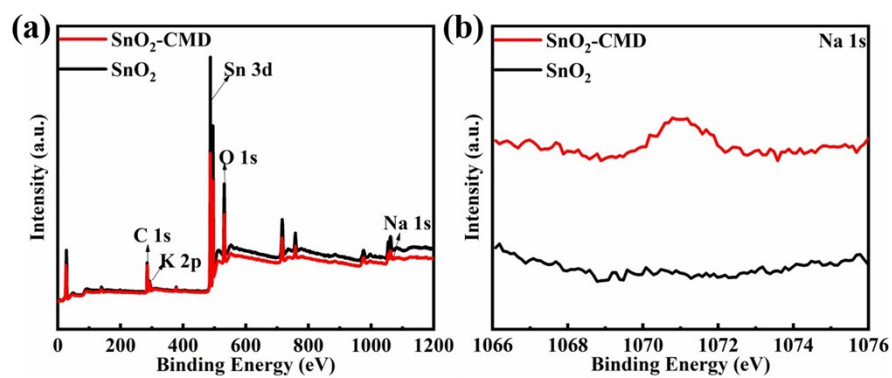

Figure S2 a) XPS spectra of SnO<sub>2</sub> and SnO<sub>2</sub>-CMD survey b) Na 1s XPS spectra of SnO<sub>2</sub> and SnO<sub>2</sub>-CMD films

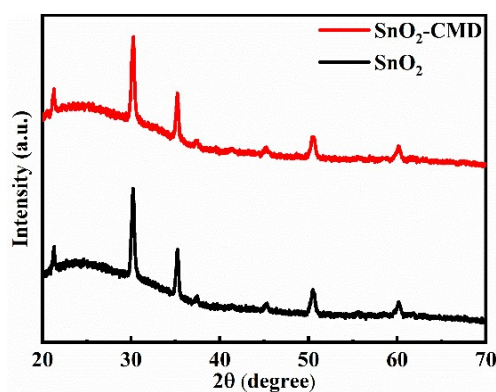

Figure S3 XRD patterns of ITO/SnO<sub>2</sub> and ITO/SnO<sub>2</sub>-CMD films.

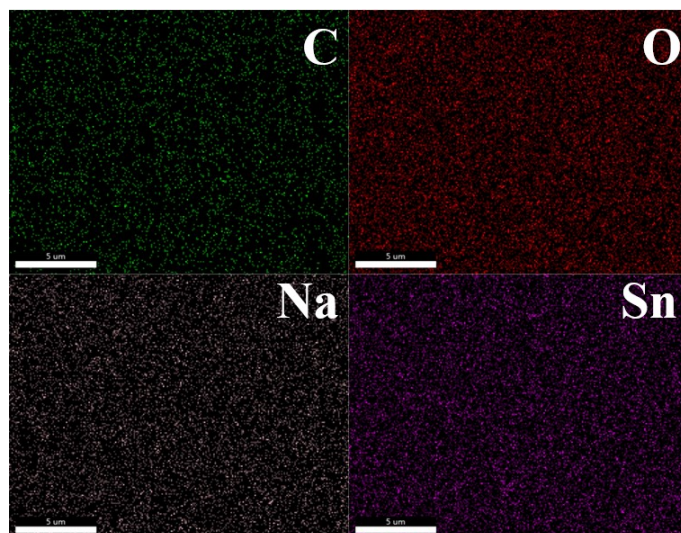

Figure S4 EDS element distribution mapping of SnO<sub>2</sub>-CMD

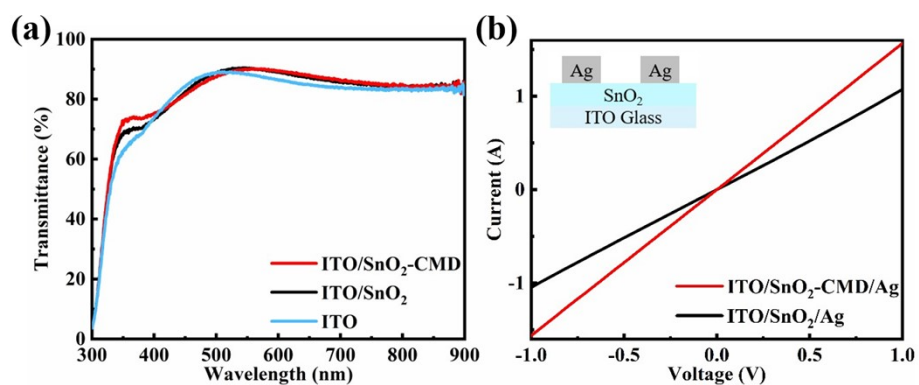

Figure S5 a) Optical transmittance spectra of ITO, SnO<sub>2</sub>, and SnO<sub>2</sub>-CMD films on ITO glass substrates. b) I–V curves of the devices of ITO/ETL/Ag with SnO<sub>2</sub> or SnO<sub>2</sub>-CMD ETL. The inset shows the device structure for conductivity measurement.

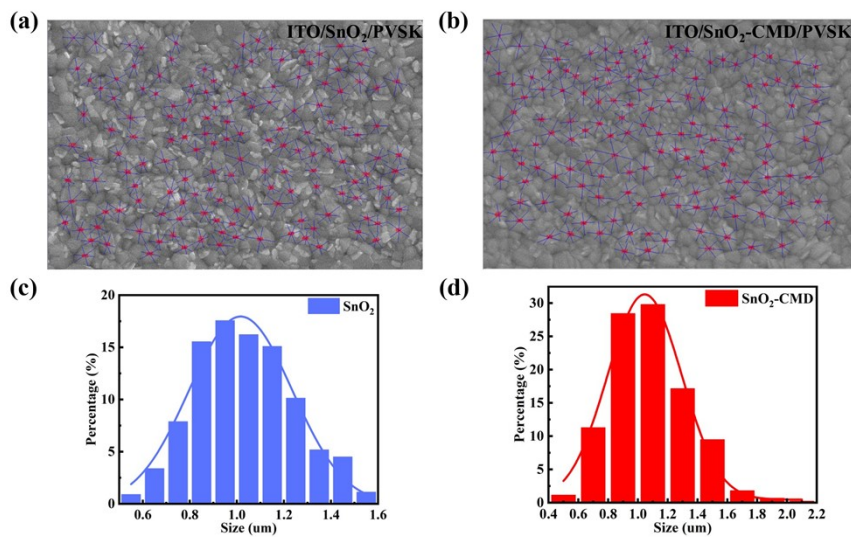

Figure S6. Screenshot of the calculation software for particulate size SnO<sub>2</sub> and SnO<sub>2</sub>-CMD.

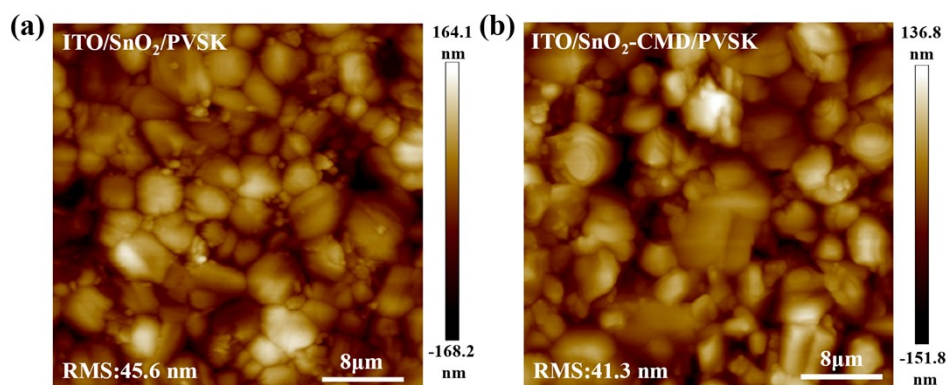

Figure S7. AFM images of (a) SnO<sub>2</sub>/PVSK and (b) SnO<sub>2</sub>-CMD/PVSK films.

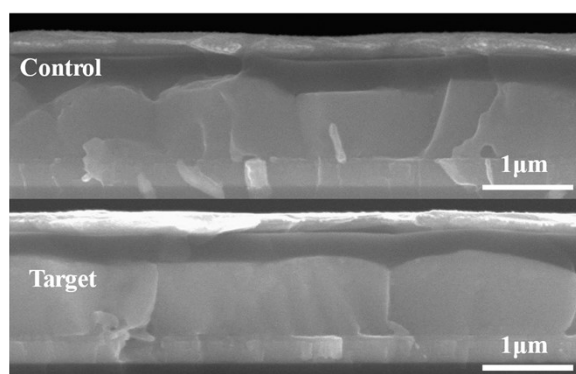

Figure S8 SEM cross-sectional view of the complete device based on the SnO<sub>2</sub>(Control) and SnO<sub>2</sub>-CMD (Target) perovskite solar cell.

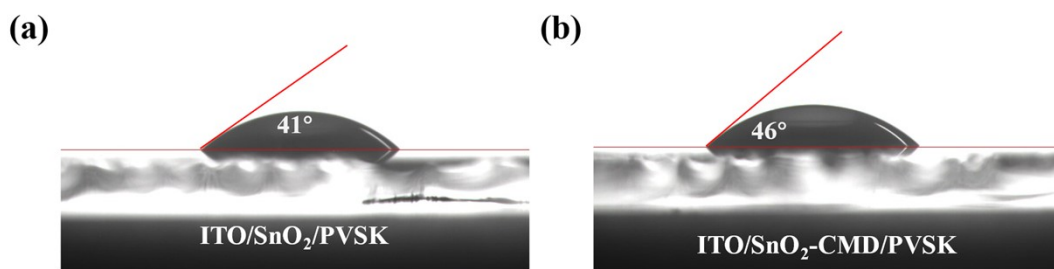

Figure S9 Contact angles for perovskite precursor on the SnO<sub>2</sub> and SnO<sub>2</sub>-CMD films

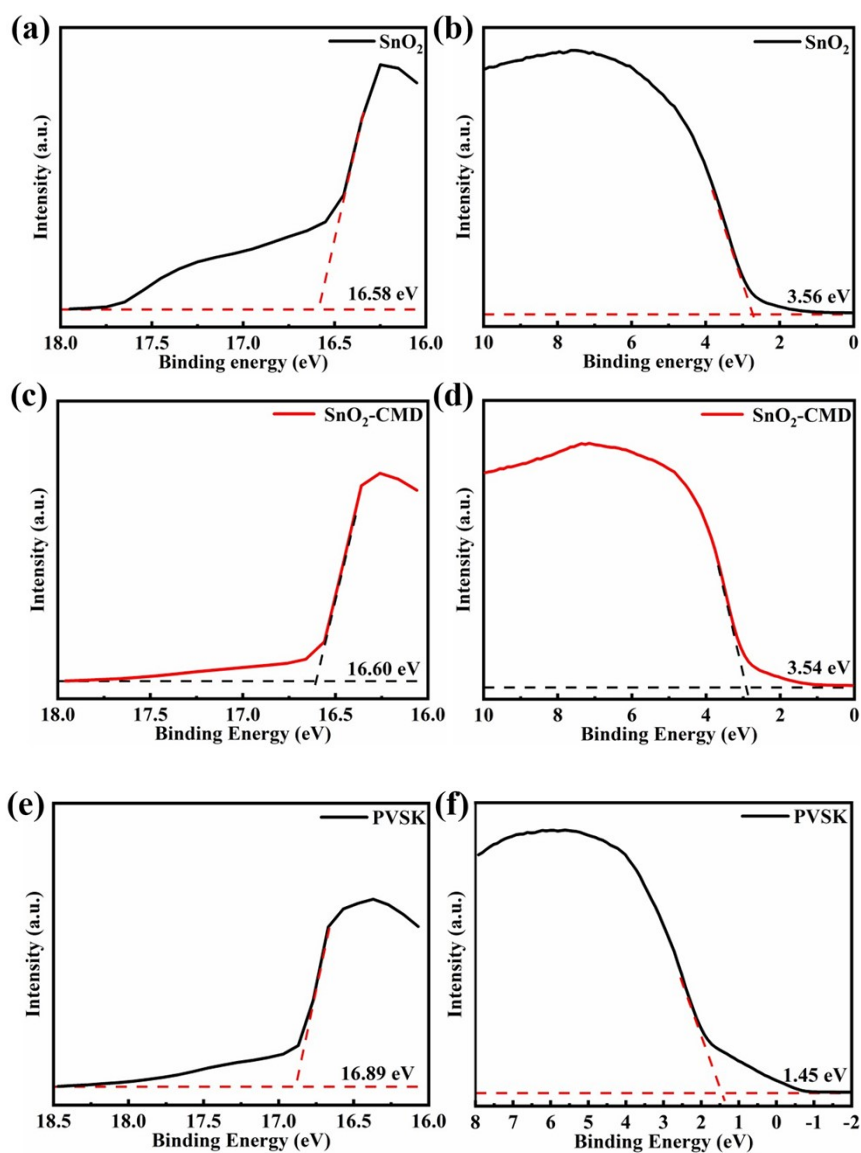

Figure S10 Ultraviolet photoelectron spectroscopy (UPS) of pristine SnO<sub>2</sub>, SnO<sub>2</sub>-CMD, and perovskite film.

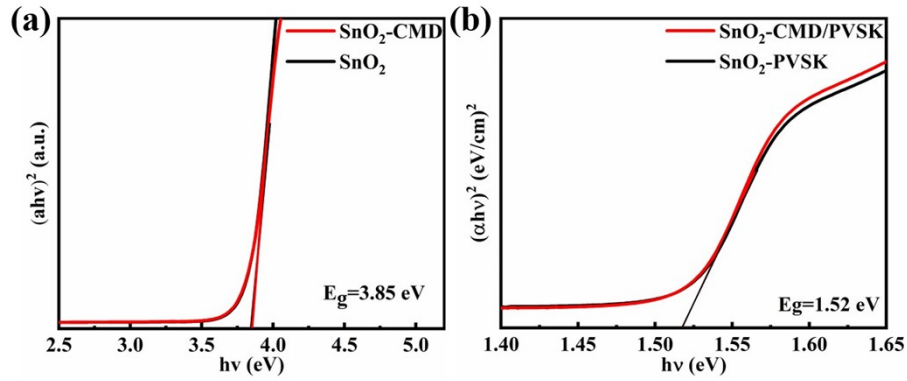

Figure S11 Tauc plots of the (a)  $\text{SnO}_2$  and  $\text{SnO}_2\text{-CMD}$  films. (b) Tauc plots of the perovskite films on  $\text{SnO}_2$  and  $\text{SnO}_2\text{-CMD}$

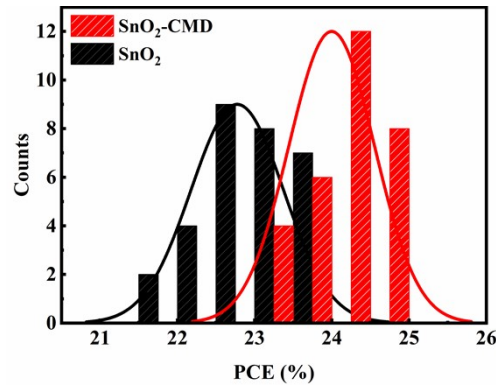

Figure S12 PCE distributions of PSCs with  $\text{SnO}_2$  and  $\text{SnO}_2\text{-CMD}$  ETL from 30 device statistics, respectively.

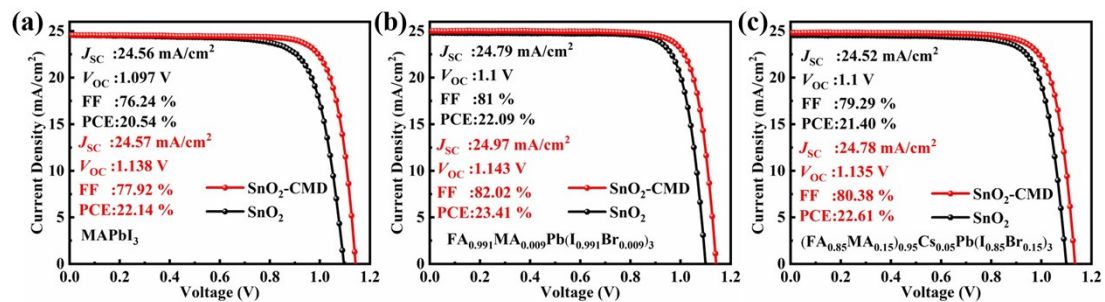

Figure S13. Based on  $\text{SnO}_2$  and  $\text{SnO}_2\text{-CMD}$  ETL, different perovskite compositions J-V curves of champion PSCs. (a)  $\text{MAPbI}_3$  (b)  $(\text{FA}_{0.85}\text{MA}_{0.15})_{0.95}\text{Cs}_{0.05}\text{Pb}(\text{I}_{0.85}\text{Br}_{0.15})_3$  (c)  $\text{FA}_{0.991}\text{MA}_{0.009}\text{Pb}(\text{I}_{0.991}\text{Br}_{0.009})_3$

Table S1. Fitted results of TRPL spectra of the perovskite films deposited on pristine SnO<sub>2</sub> and SnO<sub>2</sub>-CMD.

| ETL                   | A <sub>1</sub> | $\tau_1$ (ns) | A <sub>2</sub> | $\tau_2$ (ns) | $\tau_{ave}$ (ns) |
|-----------------------|----------------|---------------|----------------|---------------|-------------------|
| SnO <sub>2</sub>      | 0.15           | 90.30         | 0.85           | 180.70        | 173.37            |
| SnO <sub>2</sub> -CMD | 0.12           | 45.47         | 0.88           | 140.30        | 136.29            |

Table S2. Photovoltaic performance parameters of PSCs made with different concentrations of CMD.

| Concentration(mg/mL) | $J_{sc}$ (mA/cm <sup>2</sup> ) | $V_{oc}$ (V) | FF(%) | PCE(%) |
|----------------------|--------------------------------|--------------|-------|--------|
| 0                    | 24.64                          | 1.140        | 82.19 | 23.09  |
| 0.5                  | 25.07                          | 1.158        | 83.36 | 24.20  |
| 1                    | 25.16                          | 1.158        | 84.89 | 24.73  |
| 1.5                  | 25.12                          | 1.157        | 83.96 | 24.40  |

Table S3. Photovoltaic data and hysteresis index of the pristine and CMD-modified PSCs.

| ETL                   | Scan Direction | $J_{sc}$ (mA/cm <sup>2</sup> ) | $V_{oc}$ (V) | FF(%) | PCE(%) | HI     |
|-----------------------|----------------|--------------------------------|--------------|-------|--------|--------|
| SnO <sub>2</sub>      | Reverse        | 24.64                          | 1.1402       | 82.19 | 23.09  | 0.0307 |
|                       | Forward        | 24.65                          | 1.1410       | 79.58 | 22.38  |        |
| SnO <sub>2</sub> -CMD | Reverse        | 25.16                          | 1.1582       | 84.89 | 24.74  | 0.0170 |
|                       | Forward        | 25.08                          | 1.1584       | 83.70 | 24.32  |        |
